# Supplementary material for: Effects of mild steel welding fume particles on pulmonary epithelial inflammation and endothelial activation
Source: PubMed Central journal article supplement — Toxicol Ind Health. 2020 Oct 7;36(12):995–1001. doi: 10.1177/0748233720962685 (PMC7756071; doi:10.1177/0748233720962685), 2020-10-07
Supplement: Supplementary_Figures.pdf [file Supplementary_Figures.pdf]

## Supplementary Figures and Tables

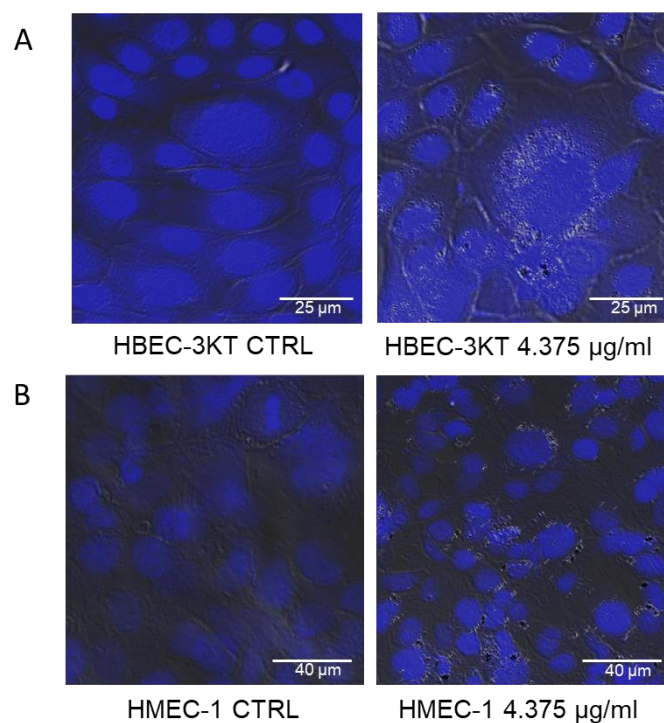

### Supplementary Figure 1.

Accumulation of MSWF particles in HBEC-3KT and HMEC-1 cells. Accumulation of MSWF particles was assessed by confocal microscopy in (A) HBEC-3KT and (B) HMEC-1 cells that were exposed to 4.375  $\mu\text{g/ml}$  MSWF for five days.

**Supplementary Table 1.** 40 genes involved in inflammation, fibrosis and endothelial activation and five housekeeping genes were included in a custom RT2 gene array (Qiagen).

| <b>Symbol</b> | <b>Gene name</b>                                                   |
|---------------|--------------------------------------------------------------------|
| <b>AQP1</b>   | Aquaporin 1                                                        |
| <b>CCL11</b>  | Eotaxin                                                            |
| <b>CCL2</b>   | Monocyte Chemoattractant Protein-1                                 |
| <b>CCL3</b>   | Macrophage Inflammatory Protein-1 $\alpha$                         |
| <b>CFTR</b>   | Cystic Fibrosis Transmembrane Conductance Regulator                |
| <b>CXCL1</b>  | C-X-C Motif Chemokine Ligand 1                                     |
| <b>CXCL10</b> | C-X-C Motif Chemokine Ligand 10                                    |
| <b>CXCL5</b>  | C-X-C Motif Chemokine Ligand 5                                     |
| <b>CXCL6</b>  | C-X-C Motif Chemokine Ligand 6                                     |
| <b>EDN1</b>   | Endothelin 1                                                       |
| <b>FGF2</b>   | Fibroblast Growth Factor 2                                         |
| <b>IFNG</b>   | Interferon Gamma                                                   |
| <b>IGF1</b>   | Insulin-like Growth Factor-1                                       |
| <b>IL10</b>   | Interleukin 10                                                     |
| <b>IL13</b>   | Interleukin 13                                                     |
| <b>IL4</b>    | Interleukin 4                                                      |
| <b>IL6</b>    | Interleukin 6                                                      |
| <b>IL8</b>    | Interleukin 8                                                      |
| <b>MICA</b>   | MHC Class I Polypeptide-Related Sequence A                         |
| <b>MIF</b>    | Macrophage Migration Inhibitory Factor                             |
| <b>MMP1</b>   | Matrix Metalloproteinase 1                                         |
| <b>MMP7</b>   | Matrix Metalloproteinase 7                                         |
| <b>MMP9</b>   | Matrix Metalloproteinase 9                                         |
| <b>MUC5B</b>  | Mucin 5B                                                           |
| <b>MUC5AC</b> | Mucin 5AC                                                          |
| <b>PARK2</b>  | Parkin                                                             |
| <b>RIOX2</b>  | Ribosomal Oxygenase 2                                              |
| <b>SAA1</b>   | Serum Amyloid A1                                                   |
| <b>SFTPD</b>  | Surfactant Protein D                                               |
| <b>SMAD4</b>  | SMAD Family Member 4                                               |
| <b>SMAD7</b>  | SMAD Family Member 7                                               |
| <b>SOCS1</b>  | Suppressor of Cytokine Signaling 1                                 |
| <b>SOCS3</b>  | Suppressor of Cytokine Signaling 3                                 |
| <b>SOD2</b>   | Superoxide Dismutase 2                                             |
| <b>TGFB1</b>  | Transforming Growth Factor Beta 1                                  |
| <b>TIMP1</b>  | TIMP Metalloproteinase Inhibitor 1                                 |
| <b>TNFA</b>   | Tumor Necrosis Factor                                              |
| <b>TRAF6</b>  | TNF Receptor Associated Factor 6                                   |
| <b>TRPV4</b>  | Transient Receptor Potential Cation Channel, Subfamily V, Member 4 |
| <b>VEGFA</b>  | Vascular Endothelial Growth Factor A                               |

**Supplementary Table 2.** Overview of MSWF particle sizes measured by DLS.

| Type of media | MSWF | Time of measurement | Z-Average $\pm$ SD |
|---------------|------|---------------------|--------------------|
| LHC9          | -    | 0 h                 | 230.5 $\pm$ 147.5  |
| LHC9          | +    | 0 h                 | 355.0 $\pm$ 45.8   |
| LHC9          | +    | 6 h                 | 491.8 $\pm$ 89.9   |
| MCDB          | -    | 0 h                 | 15.2 $\pm$ 0.6     |
| MCDB          | +    | 0 h                 | 145.4 $\pm$ 38.0   |
| MCDB          | +    | 6 h                 | 146.6 $\pm$ 34.6   |
| RPMI-1670     | -    | 0 h                 | 14.9 $\pm$ 0       |
| RPMI-1670     | +    | 0 h                 | 104.2 $\pm$ 11.3   |
| RPMI-1670     | +    | 6 h                 | 185.5 $\pm$ 1.5    |

**Supplementary Table 3.** Fold changes in gene expression levels following MSWF exposure. Significance was determined by one-way ANOVA with Bonferroni's correction, \*\*\* P<0.001 and \*\* P<0.01.

| Gene          | Exposure Time | Concentration | HBEC-3KT Mean±SD | HMEC1 Mean±SD | THP1 Mean±SD |
|---------------|---------------|---------------|------------------|---------------|--------------|
| <i>AQP1</i>   | Day 1         | 0 µg/ml       | 1,01±0,18        | 1,03±0,27     | 1,45±0,79    |
| <i>AQP1</i>   | Day 1         | 0.035 µg/ml   | 0,85±0,04        | 0,89±0,20     | 1,36±0,57    |
| <i>AQP1</i>   | Day 1         | 4.375 µg/ml   | 0,86±0,06        | 0,95±0,27     | 1,26±0,77    |
| <i>AQP1</i>   | Day 5         | 0 µg/ml       | 1,01±0,13        | 1,05±0,08     |              |
| <i>AQP1</i>   | Day 5         | 0.035 µg/ml   | 0,96±0,26        | 0,93±0,09     |              |
| <i>AQP1</i>   | Day 5         | 4.375 µg/ml   | 0,95±0,06        | 0,92±0,25     |              |
| <i>CCL11</i>  | Day 1         | 0 µg/ml       | 1,01±0,18        | 1,01±0,17     | 0,73±0,36    |
| <i>CCL11</i>  | Day 1         | 0.035 µg/ml   | 0,85±0,04        | 1,72±0,81     | 1,11±1,06    |
| <i>CCL11</i>  | Day 1         | 4.375 µg/ml   | 0,86±0,06        | 1,32±0,70     | 1,50±1,21    |
| <i>CCL11</i>  | Day 5         | 0 µg/ml       | 1,01±0,13        | 1,07±0,30     |              |
| <i>CCL11</i>  | Day 5         | 0.035 µg/ml   | 0,96±0,26        | 0,89±0,14     |              |
| <i>CCL11</i>  | Day 5         | 4.375 µg/ml   | 0,95±0,06        | 0,84±0,09     |              |
| <i>CCL2</i>   | Day 1         | 0 µg/ml       | 1,01±0,18        | 1,10±0,51     | 0,97±0,38    |
| <i>CCL2</i>   | Day 1         | 0.035 µg/ml   | 0,85±0,04        | 1,08±0,47     | 0,96±0,46    |
| <i>CCL2</i>   | Day 1         | 4.375 µg/ml   | 0,86±0,06        | 1,27±0,42     | 1,02±0,20    |
| <i>CCL2</i>   | Day 5         | 0 µg/ml       | 1,01±0,13        | 1,15±0,31     |              |
| <i>CCL2</i>   | Day 5         | 0.035 µg/ml   | 0,96±0,26        | 1,07±0,32     |              |
| <i>CCL2</i>   | Day 5         | 4.375 µg/ml   | 0,95±0,06        | 0,81±0,20     |              |
| <i>CCL3</i>   | Day 1         | 0 µg/ml       | 1,01±0,18        | 1,01±0,15     | 1,02±0,22    |
| <i>CCL3</i>   | Day 1         | 0.035 µg/ml   | 0,85±0,04        | 0,95±0,17     | 1,01±0,20    |
| <i>CCL3</i>   | Day 1         | 4.375 µg/ml   | 0,86±0,06        | 0,94±0,18     | 1,31±0,12    |
| <i>CCL3</i>   | Day 5         | 0 µg/ml       | 1,01±0,13        | 1,00±0,16     |              |
| <i>CCL3</i>   | Day 5         | 0.035 µg/ml   | 0,96±0,26        | 1,04±0,16     |              |
| <i>CCL3</i>   | Day 5         | 4.375 µg/ml   | 0,95±0,06        | 0,98±0,10     |              |
| <i>CFTR</i>   | Day 1         | 0 µg/ml       | 1,01±0,18        | 1,01±0,15     | 0,83±0,04    |
| <i>CFTR</i>   | Day 1         | 0.035 µg/ml   | 0,86±0,05        | 0,95±0,17     | 1,87±1,84    |
| <i>CFTR</i>   | Day 1         | 4.375 µg/ml   | 0,86±0,06        | 0,94±0,18     | 2,69±1,76    |
| <i>CFTR</i>   | Day 5         | 0 µg/ml       | 1,03±0,29        | 1,09±0,48     |              |
| <i>CFTR</i>   | Day 5         | 0.035 µg/ml   | 0,88±0,24        | 0,93±0,15     |              |
| <i>CFTR</i>   | Day 5         | 4.375 µg/ml   | 0,98±0,15        | 0,88±0,09     |              |
| <i>CXCL1</i>  | Day 1         | 0 µg/ml       | 1,03±0,34        | 1,07±0,42     | 1,06±0,95    |
| <i>CXCL1</i>  | Day 1         | 0.035 µg/ml   | 0,91±0,19        | 0,94±0,21     | 0,85±0,64    |
| <i>CXCL1</i>  | Day 1         | 4.375 µg/ml   | 0,96±0,19        | 1,09±0,15     | 1,21±0,88    |
| <i>CXCL1</i>  | Day 5         | 0 µg/ml       | 1,01±0,19        | 1,10±0,34     |              |
| <i>CXCL1</i>  | Day 5         | 0.035 µg/ml   | 1,16±0,55        | 1,10±0,31     |              |
| <i>CXCL1</i>  | Day 5         | 4.375 µg/ml   | 1,26±0,69        | 1,40±0,64     |              |
| <i>CXCL10</i> | Day 1         | 0 µg/ml       | 1,12±0,69        | 1,01±0,19     | 0,96±0,33    |

|               |       |             |           |           |           |
|---------------|-------|-------------|-----------|-----------|-----------|
| <b>CXCL10</b> | Day 1 | 0.035 µg/ml | 0,89±0,42 | 0,93±0,15 | 0,59±0,05 |
| <b>CXCL10</b> | Day 1 | 4.375 µg/ml | 0,77±0,07 | 0,91±0,17 | 0,82±0,29 |
| <b>CXCL10</b> | Day 5 | 0 µg/ml     | 1,12±0,69 | 1,27±0,63 |           |
| <b>CXCL10</b> | Day 5 | 0.035 µg/ml | 1,49±1,03 | 1,18±0,12 |           |
| <b>CXCL10</b> | Day 5 | 4.375 µg/ml | 2,23±1,45 | 0,78±0,23 |           |
| <b>CXCL5</b>  | Day 1 | 0 µg/ml     | 1,01±0,18 | 1,01±0,15 | 1,03±0,38 |
| <b>CXCL5</b>  | Day 1 | 0.035 µg/ml | 0,88±0,02 | 0,84±0,17 | 1,06±0,20 |
| <b>CXCL5</b>  | Day 1 | 4.375 µg/ml | 0,86±0,06 | 1,14±0,10 | 1,09±0,33 |
| <b>CXCL5</b>  | Day 5 | 0 µg/ml     | 1,01±0,13 | 1,06±0,17 |           |
| <b>CXCL5</b>  | Day 5 | 0.035 µg/ml | 0,96±0,26 | 1,23±0,11 |           |
| <b>CXCL5</b>  | Day 5 | 4.375 µg/ml | 0,95±0,06 | 1,33±0,18 |           |
| <b>CXCL6</b>  | Day 1 | 0 µg/ml     | 1,01±0,18 | 1,00±0,12 | 1,01±0,45 |
| <b>CXCL6</b>  | Day 1 | 0.035 µg/ml | 0,85±0,04 | 0,86±0,20 | 0,88±0,37 |
| <b>CXCL6</b>  | Day 1 | 4.375 µg/ml | 0,86±0,06 | 1,07±0,07 | 1,14±0,75 |
| <b>CXCL6</b>  | Day 5 | 0 µg/ml     | 1,01±0,13 | 1,15±0,39 |           |
| <b>CXCL6</b>  | Day 5 | 0.035 µg/ml | 0,96±0,26 | 1,34±0,44 |           |
| <b>CXCL6</b>  | Day 5 | 4.375 µg/ml | 0,95±0,06 | 1,52±0,59 |           |
| <b>EDN1</b>   | Day 1 | 0 µg/ml     | 1,00±0,03 | 1,02±0,25 | 0,91±0,18 |
| <b>EDN1</b>   | Day 1 | 0.035 µg/ml | 0,93±0,10 | 1,00±0,21 | 1,09±0,18 |
| <b>EDN1</b>   | Day 1 | 4.375 µg/ml | 0,80±0,04 | 0,95±0,29 | 1,33±0,13 |
| <b>EDN1</b>   | Day 5 | 0 µg/ml     | 1,06±0,46 | 1,00±0,05 |           |
| <b>EDN1</b>   | Day 5 | 0.035 µg/ml | 1,06±0,48 | 1,04±0,06 |           |
| <b>EDN1</b>   | Day 5 | 4.375 µg/ml | 0,84±0,25 | 0,96±0,13 |           |
| <b>FGF2</b>   | Day 1 | 0 µg/ml     | 1,02±0,27 | 1,00±0,05 | 1,01±0,14 |
| <b>FGF2</b>   | Day 1 | 0.035 µg/ml | 0,85±0,08 | 1,02±0,04 | 0,99±0,21 |
| <b>FGF2</b>   | Day 1 | 4.375 µg/ml | 1,06±0,16 | 1,05±0,10 | 1,02±0,13 |
| <b>FGF2</b>   | Day 5 | 0 µg/ml     | 1,00±0,10 | 1,02±0,05 |           |
| <b>FGF2</b>   | Day 5 | 0.035 µg/ml | 0,94±0,02 | 1,08±0,02 |           |
| <b>FGF2</b>   | Day 5 | 4.375 µg/ml | 1,09±0,09 | 1,02±0,03 |           |
| <b>IFNG</b>   | Day 1 | 0 µg/ml     | 1,01±0,18 | 1,01±0,15 | 0,70±0,14 |
| <b>IFNG</b>   | Day 1 | 0.035 µg/ml | 0,85±0,04 | 0,95±0,17 | 1,14±0,96 |
| <b>IFNG</b>   | Day 1 | 4.375 µg/ml | 0,86±0,06 | 0,94±0,18 | 1,27±0,70 |
| <b>IFNG</b>   | Day 5 | 0 µg/ml     | 1,01±0,13 | 1,00±0,16 |           |
| <b>IFNG</b>   | Day 5 | 0.035 µg/ml | 0,96±0,26 | 1,04±0,16 |           |
| <b>IFNG</b>   | Day 5 | 4.375 µg/ml | 0,95±0,06 | 0,98±0,10 |           |
| <b>IGF1</b>   | Day 1 | 0 µg/ml     | 1,01±0,22 | 1,01±0,15 | 0,95±0,26 |
| <b>IGF1</b>   | Day 1 | 0.035 µg/ml | 1,14±0,13 | 0,95±0,17 | 1,21±0,38 |
| <b>IGF1</b>   | Day 1 | 4.375 µg/ml | 1,03±0,07 | 0,94±0,18 | 1,14±0,39 |
| <b>IGF1</b>   | Day 5 | 0 µg/ml     | 1,00±0,10 | 1,00±0,16 |           |
| <b>IGF1</b>   | Day 5 | 0.035 µg/ml | 0,87±0,20 | 1,07±0,15 |           |
| <b>IGF1</b>   | Day 5 | 4.375 µg/ml | 0,67±0,25 | 1,22±0,12 |           |
| <b>IL10</b>   | Day 1 | 0 µg/ml     | 1,01±0,18 | 1,01±0,15 | 1,04±1,04 |
| <b>IL10</b>   | Day 1 | 0.035 µg/ml | 0,85±0,04 | 0,95±0,17 | 0,66±0,40 |

|             |       |             |           |           |           |
|-------------|-------|-------------|-----------|-----------|-----------|
| <b>IL10</b> | Day 1 | 4.375 µg/ml | 0,86±0,06 | 0,94±0,18 | 0,84±0,65 |
| <b>IL10</b> | Day 5 | 0 µg/ml     | 1,01±0,13 | 1,00±0,16 |           |
| <b>IL10</b> | Day 5 | 0.035 µg/ml | 0,96±0,26 | 1,04±0,16 |           |
| <b>IL10</b> | Day 5 | 4.375 µg/ml | 0,95±0,06 | 0,98±0,10 |           |
| <b>IL13</b> | Day 1 | 0 µg/ml     | 1,01±0,18 | 1,01±0,15 | 0,87±0,35 |
| <b>IL13</b> | Day 1 | 0.035 µg/ml | 0,85±0,04 | 0,95±0,17 | 0,74±0,29 |
| <b>IL13</b> | Day 1 | 4.375 µg/ml | 0,86±0,06 | 1,10±0,41 | 1,32±0,68 |
| <b>IL13</b> | Day 5 | 0 µg/ml     | 1,01±0,13 | 1,00±0,16 |           |
| <b>IL13</b> | Day 5 | 0.035 µg/ml | 1,04±0,22 | 1,04±0,16 |           |
| <b>IL13</b> | Day 5 | 4.375 µg/ml | 0,95±0,06 | 0,98±0,10 |           |
| <b>IL4</b>  | Day 1 | 0 µg/ml     | 1,05±0,42 | 1,04±0,36 | 0,81±0,06 |
| <b>IL4</b>  | Day 1 | 0.035 µg/ml | 1,48±1,02 | 0,89±0,27 | 1,40±1,05 |
| <b>IL4</b>  | Day 1 | 4.375 µg/ml | 1,36±1,01 | 0,79±0,63 | 1,21±0,54 |
| <b>IL4</b>  | Day 5 | 0 µg/ml     | 1,01±0,22 | 1,10±0,59 |           |
| <b>IL4</b>  | Day 5 | 0.035 µg/ml | 1,15±0,05 | 0,71±0,09 |           |
| <b>IL4</b>  | Day 5 | 4.375 µg/ml | 0,95±0,36 | 1,23±0,31 |           |
| <b>IL6</b>  | Day 1 | 0 µg/ml     | 1,01±0,18 | 1,00±0,10 | 0,91±0,17 |
| <b>IL6</b>  | Day 1 | 0.035 µg/ml | 0,85±0,04 | 0,93±0,03 | 1,33±0,79 |
| <b>IL6</b>  | Day 1 | 4.375 µg/ml | 0,86±0,06 | 1,06±0,17 | 1,07±0,40 |
| <b>IL6</b>  | Day 5 | 0 µg/ml     | 1,01±0,13 | 1,05±0,10 |           |
| <b>IL6</b>  | Day 5 | 0.035 µg/ml | 0,96±0,26 | 1,07±0,10 |           |
| <b>IL6</b>  | Day 5 | 4.375 µg/ml | 0,95±0,06 | 0,98±0,06 |           |
| <b>IL8</b>  | Day 1 | 0 µg/ml     | 1,00±0,05 | 1,10±0,54 | 0,94±0,67 |
| <b>IL8</b>  | Day 1 | 0.035 µg/ml | 0,93±0,18 | 1,01±0,36 | 0,84±0,43 |
| <b>IL8</b>  | Day 1 | 4.375 µg/ml | 1,07±0,02 | 1,49±0,76 | 1,70±1,26 |
| <b>IL8</b>  | Day 5 | 0 µg/ml     | 1,07±0,47 | 1,20±0,57 |           |
| <b>IL8</b>  | Day 5 | 0.035 µg/ml | 0,97±0,71 | 1,06±0,36 |           |
| <b>IL8</b>  | Day 5 | 4.375 µg/ml | 1,60±0,93 | 1,57±0,83 |           |
| <b>MICA</b> | Day 1 | 0 µg/ml     | 1,00±0,12 | 1,00±0,10 | 1,08±0,41 |
| <b>MICA</b> | Day 1 | 0.035 µg/ml | 0,90±0,05 | 0,94±0,09 | 1,04±0,25 |
| <b>MICA</b> | Day 1 | 4.375 µg/ml | 0,94±0,04 | 0,89±0,14 | 0,94±0,19 |
| <b>MICA</b> | Day 5 | 0 µg/ml     | 1,00±0,04 | 1,04±0,13 |           |
| <b>MICA</b> | Day 5 | 0.035 µg/ml | 1,00±0,08 | 1,03±0,11 |           |
| <b>MICA</b> | Day 5 | 4.375 µg/ml | 0,98±0,08 | 1,07±0,09 |           |
| <b>MIF</b>  | Day 1 | 0 µg/ml     | 1,00±0,12 | 1,00±0,04 | 0,98±0,05 |
| <b>MIF</b>  | Day 1 | 0.035 µg/ml | 0,89±0,09 | 0,99±0,08 | 1,03±0,05 |
| <b>MIF</b>  | Day 1 | 4.375 µg/ml | 0,89±0,07 | 1,02±0,04 | 1,01±0,02 |
| <b>MIF</b>  | Day 5 | 0 µg/ml     | 1,00±0,11 | 1,00±0,08 |           |
| <b>MIF</b>  | Day 5 | 0.035 µg/ml | 1,05±0,09 | 1,02±0,03 |           |
| <b>MIF</b>  | Day 5 | 4.375 µg/ml | 0,99±0,06 | 1,03±0,05 |           |
| <b>MINA</b> | Day 1 | 0 µg/ml     | 1,00±0,03 | 1,07±0,17 | 0,99±0,10 |
| <b>MINA</b> | Day 1 | 0.035 µg/ml | 0,95±0,03 | 1,04±0,09 | 1,03±0,07 |
| <b>MINA</b> | Day 1 | 4.375 µg/ml | 0,95±0,02 | 1,03±0,08 | 1,06±0,07 |

|               |       |             |                      |                    |           |
|---------------|-------|-------------|----------------------|--------------------|-----------|
| <b>MINA</b>   | Day 5 | 0 µg/ml     | 1,00±0,08            | 0,99±0,03          |           |
| <b>MINA</b>   | Day 5 | 0.035 µg/ml | 1,00±0,11            | 0,95±0,06          |           |
| <b>MINA</b>   | Day 5 | 4.375 µg/ml | 1,02±0,11            | 0,97±0,08          |           |
| <b>MMP1</b>   | Day 1 | 0 µg/ml     | 1,04±0,32            | 1,00±0,00          | 1,76±1,44 |
| <b>MMP1</b>   | Day 1 | 0.035 µg/ml | 0,99±0,28            | 0,90±0,08          | 1,90±1,59 |
| <b>MMP1</b>   | Day 1 | 4.375 µg/ml | 1,15±0,33            | 0,93±0,19          | 1,97±1,51 |
| <b>MMP1</b>   | Day 5 | 0 µg/ml     | 1,01±0,19            | 1,00±0,00          |           |
| <b>MMP1</b>   | Day 5 | 0.035 µg/ml | 1,11±0,11            | 1,22±0,12          |           |
| <b>MMP1</b>   | Day 5 | 4.375 µg/ml | <b>2,01±0,17 ***</b> | <b>2,40±0,50**</b> |           |
| <b>MMP7</b>   | Day 1 | 0 µg/ml     | 1,11±0,54            | 1,01±0,15          | 0,95±0,84 |
| <b>MMP7</b>   | Day 1 | 0.035 µg/ml | 1,19±0,32            | 0,95±0,17          | 1,00±0,91 |
| <b>MMP7</b>   | Day 1 | 4.375 µg/ml | 1,13±0,37            | 0,94±0,18          | 1,27±1,19 |
| <b>MMP7</b>   | Day 5 | 0 µg/ml     | 1,01±0,16            | 1,00±0,16          |           |
| <b>MMP7</b>   | Day 5 | 0.035 µg/ml | 1,12±0,23            | 1,11±0,13          |           |
| <b>MMP7</b>   | Day 5 | 4.375 µg/ml | 0,97±0,23            | 0,98±0,10          |           |
| <b>MMP9</b>   | Day 1 | 0 µg/ml     | 1,12±0,57            | 1,01±0,16          | 1,35±1,73 |
| <b>MMP9</b>   | Day 1 | 0.035 µg/ml | 1,03±0,55            | 1,17±0,32          | 1,19±1,43 |
| <b>MMP9</b>   | Day 1 | 4.375 µg/ml | 1,10±0,55            | 1,10±0,26          | 1,21±1,47 |
| <b>MMP9</b>   | Day 5 | 0 µg/ml     | 1,08±0,51            | 1,20±0,47          |           |
| <b>MMP9</b>   | Day 5 | 0.035 µg/ml | 1,19±0,52            | 0,83±0,18          |           |
| <b>MMP9</b>   | Day 5 | 4.375 µg/ml | 1,44±0,54            | 0,87±0,15          |           |
| <b>MUC5AC</b> | Day 1 | 0 µg/ml     | 1,01±0,18            | 1,00±0,06          | 0,94±0,05 |
| <b>MUC5AC</b> | Day 1 | 0.035 µg/ml | 0,85±0,04            | 1,06±0,27          | 1,01±0,19 |
| <b>MUC5AC</b> | Day 1 | 4.375 µg/ml | 0,86±0,06            | 0,87±0,17          | 1,28±0,67 |
| <b>MUC5AC</b> | Day 5 | 0 µg/ml     | 1,01±0,13            | 0,88±0,14          |           |
| <b>MUC5AC</b> | Day 5 | 0.035 µg/ml | 0,96±0,26            | 1,34±0,45          |           |
| <b>MUC5AC</b> | Day 5 | 4.375 µg/ml | 0,95±0,06            | 1,63±0,83          |           |
| <b>MUC5B</b>  | Day 1 | 0 µg/ml     | 1,01±0,18            | 1,01±0,13          | 0,95±0,28 |
| <b>MUC5B</b>  | Day 1 | 0.035 µg/ml | 0,85±0,04            | 1,01±0,33          | 0,84±0,28 |
| <b>MUC5B</b>  | Day 1 | 4.375 µg/ml | 0,86±0,06            | 0,90±0,17          | 0,75±0,36 |
| <b>MUC5B</b>  | Day 5 | 0 µg/ml     | 1,01±0,13            | 0,88±0,24          |           |
| <b>MUC5B</b>  | Day 5 | 0.035 µg/ml | 0,96±0,26            | 0,86±0,02          |           |
| <b>MUC5B</b>  | Day 5 | 4.375 µg/ml | 0,95±0,06            | 0,96±0,21          |           |
| <b>PARK2</b>  | Day 1 | 0 µg/ml     | 1,01±0,18            | 1,01±0,15          | 0,89±0,23 |
| <b>PARK2</b>  | Day 1 | 0.035 µg/ml | 0,90±0,10            | 0,95±0,17          | 0,91±0,16 |
| <b>PARK2</b>  | Day 1 | 4.375 µg/ml | 0,89±0,03            | 0,94±0,18          | 0,93±0,32 |
| <b>PARK2</b>  | Day 5 | 0 µg/ml     | 1,01±0,19            | 1,00±0,16          |           |
| <b>PARK2</b>  | Day 5 | 0.035 µg/ml | 0,94±0,53            | 1,04±0,16          |           |
| <b>PARK2</b>  | Day 5 | 4.375 µg/ml | 1,12±0,33            | 0,98±0,10          |           |
| <b>SAA1</b>   | Day 1 | 0 µg/ml     | 1,05±0,42            | 1,01±0,15          | 0,86±0,31 |
| <b>SAA1</b>   | Day 1 | 0.035 µg/ml | 0,97±0,27            | 0,95±0,17          | 1,15±0,29 |
| <b>SAA1</b>   | Day 1 | 4.375 µg/ml | 0,96±0,30            | 0,94±0,18          | 1,34±0,30 |
| <b>SAA1</b>   | Day 5 | 0 µg/ml     | 1,00±0,06            | 1,00±0,14          |           |

|              |       |             |           |           |           |
|--------------|-------|-------------|-----------|-----------|-----------|
| <b>SAA1</b>  | Day 5 | 0.035 µg/ml | 0,87±0,07 | 1,03±0,16 |           |
| <b>SAA1</b>  | Day 5 | 4.375 µg/ml | 0,96±0,10 | 0,97±0,10 |           |
| <b>SFTPD</b> | Day 1 | 0 µg/ml     | 1,24±0,86 | 1,03±0,29 | 0,98±0,06 |
| <b>SFTPD</b> | Day 1 | 0.035 µg/ml | 1,05±0,58 | 0,87±0,15 | 0,92±0,19 |
| <b>SFTPD</b> | Day 1 | 4.375 µg/ml | 1,08±0,54 | 0,85±0,16 | 1,04±0,22 |
| <b>SFTPD</b> | Day 5 | 0 µg/ml     | 1,10±0,58 | 1,00±0,15 |           |
| <b>SFTPD</b> | Day 5 | 0.035 µg/ml | 1,21±0,61 | 1,11±0,17 |           |
| <b>SFTPD</b> | Day 5 | 4.375 µg/ml | 0,84±0,15 | 1,04±0,13 |           |
| <b>SMAD4</b> | Day 1 | 0 µg/ml     | 1,00±0,06 | 1,00±0,07 | 1,04±0,05 |
| <b>SMAD4</b> | Day 1 | 0.035 µg/ml | 0,98±0,06 | 0,95±0,06 | 1,06±0,14 |
| <b>SMAD4</b> | Day 1 | 4.375 µg/ml | 1,00±0,10 | 0,95±0,07 | 1,02±0,14 |
| <b>SMAD4</b> | Day 5 | 0 µg/ml     | 1,00±0,09 | 0,99±0,05 |           |
| <b>SMAD4</b> | Day 5 | 0.035 µg/ml | 0,94±0,03 | 1,03±0,03 |           |
| <b>SMAD4</b> | Day 5 | 4.375 µg/ml | 1,03±0,02 | 1,01±0,07 |           |
| <b>SMAD7</b> | Day 1 | 0 µg/ml     | 1,01±0,17 | 1,01±0,17 | 1,00±0,15 |
| <b>SMAD7</b> | Day 1 | 0.035 µg/ml | 0,92±0,05 | 0,99±0,10 | 0,95±0,09 |
| <b>SMAD7</b> | Day 1 | 4.375 µg/ml | 1,00±0,03 | 1,02±0,19 | 0,90±0,07 |
| <b>SMAD7</b> | Day 5 | 0 µg/ml     | 1,02±0,23 | 1,01±0,11 |           |
| <b>SMAD7</b> | Day 5 | 0.035 µg/ml | 1,07±0,44 | 1,07±0,13 |           |
| <b>SMAD7</b> | Day 5 | 4.375 µg/ml | 1,08±0,13 | 1,02±0,05 |           |
| <b>SOCS1</b> | Day 1 | 0 µg/ml     | 1,04±0,36 | 1,01±0,13 | 0,96±0,09 |
| <b>SOCS1</b> | Day 1 | 0.035 µg/ml | 0,77±0,11 | 1,11±0,01 | 0,85±0,10 |
| <b>SOCS1</b> | Day 1 | 4.375 µg/ml | 1,04±0,06 | 1,13±0,23 | 0,84±0,12 |
| <b>SOCS1</b> | Day 5 | 0 µg/ml     | 1,00±0,10 | 1,00±0,08 |           |
| <b>SOCS1</b> | Day 5 | 0.035 µg/ml | 0,94±0,12 | 0,96±0,12 |           |
| <b>SOCS1</b> | Day 5 | 4.375 µg/ml | 0,86±0,06 | 0,99±0,07 |           |
| <b>SOCS3</b> | Day 1 | 0 µg/ml     | 1,00±0,05 | 1,00±0,11 | 0,89±0,31 |
| <b>SOCS3</b> | Day 1 | 0.035 µg/ml | 0,94±0,12 | 1,00±0,01 | 0,66±0,10 |
| <b>SOCS3</b> | Day 1 | 4.375 µg/ml | 1,19±0,10 | 0,94±0,07 | 0,88±0,26 |
| <b>SOCS3</b> | Day 5 | 0 µg/ml     | 1,01±0,18 | 1,02±0,16 |           |
| <b>SOCS3</b> | Day 5 | 0.035 µg/ml | 0,97±0,08 | 1,12±0,08 |           |
| <b>SOCS3</b> | Day 5 | 4.375 µg/ml | 1,37±0,22 | 1,18±0,04 |           |
| <b>SOD2</b>  | Day 1 | 0 µg/ml     | 1,01±0,14 | 1,00±0,11 | 0,97±0,08 |
| <b>SOD2</b>  | Day 1 | 0.035 µg/ml | 0,93±0,07 | 1,10±0,07 | 0,96±0,05 |
| <b>SOD2</b>  | Day 1 | 4.375 µg/ml | 0,93±0,05 | 1,08±0,04 | 1,12±0,11 |
| <b>SOD2</b>  | Day 5 | 0 µg/ml     | 1,00±0,10 | 1,03±0,09 |           |
| <b>SOD2</b>  | Day 5 | 0.035 µg/ml | 1,01±0,12 | 1,04±0,09 |           |
| <b>SOD2</b>  | Day 5 | 4.375 µg/ml | 1,05±0,07 | 1,04±0,05 |           |
| <b>TGFB1</b> | Day 1 | 0 µg/ml     | 1,01±0,15 | 1,00±0,11 | 0,95±0,14 |
| <b>TGFB1</b> | Day 1 | 0.035 µg/ml | 0,91±0,02 | 0,97±0,11 | 0,87±0,09 |
| <b>TGFB1</b> | Day 1 | 4.375 µg/ml | 0,93±0,05 | 0,92±0,15 | 0,85±0,04 |
| <b>TGFB1</b> | Day 5 | 0 µg/ml     | 1,01±0,13 | 1,02±0,02 |           |
| <b>TGFB1</b> | Day 5 | 0.035 µg/ml | 1,05±0,21 | 1,03±0,03 |           |



|              |       |             |           |           |           |
|--------------|-------|-------------|-----------|-----------|-----------|
| <b>TGFB1</b> | Day 5 | 4.375 µg/ml | 1,04±0,03 | 0,94±0,05 |           |
| <b>TIMP1</b> | Day 1 | 0 µg/ml     | 1,01±0,16 | 1,03±0,28 | 1,04±0,16 |
| <b>TIMP1</b> | Day 1 | 0.035 µg/ml | 0,92±0,06 | 1,06±0,29 | 1,08±0,08 |
| <b>TIMP1</b> | Day 1 | 4.375 µg/ml | 0,97±0,13 | 1,10±0,22 | 0,99±0,11 |
| <b>TIMP1</b> | Day 5 | 0 µg/ml     | 1,00±0,10 | 0,99±0,02 |           |
| <b>TIMP1</b> | Day 5 | 0.035 µg/ml | 1,13±0,12 | 1,00±0,06 |           |
| <b>TIMP1</b> | Day 5 | 4.375 µg/ml | 1,16±0,03 | 0,86±0,04 |           |
| <b>TNF</b>   | Day 1 | 0 µg/ml     | 1,01±0,18 | 1,01±0,15 | 0,99±0,17 |
| <b>TNF</b>   | Day 1 | 0.035 µg/ml | 0,85±0,04 | 0,95±0,17 | 0,90±0,22 |
| <b>TNF</b>   | Day 1 | 4.375 µg/ml | 0,86±0,06 | 0,94±0,18 | 1,23±0,22 |
| <b>TNF</b>   | Day 5 | 0 µg/ml     | 1,01±0,13 | 1,00±0,16 |           |
| <b>TNF</b>   | Day 5 | 0.035 µg/ml | 0,96±0,26 | 1,04±0,16 |           |
| <b>TNF</b>   | Day 5 | 4.375 µg/ml | 0,95±0,06 | 0,98±0,10 |           |
| <b>TRAF6</b> | Day 1 | 0 µg/ml     | 1,00±0,06 | 1,00±0,01 | 1,01±0,13 |
| <b>TRAF6</b> | Day 1 | 0.035 µg/ml | 0,91±0,08 | 0,97±0,06 | 1,01±0,22 |
| <b>TRAF6</b> | Day 1 | 4.375 µg/ml | 0,99±0,05 | 1,01±0,10 | 1,13±0,12 |
| <b>TRAF6</b> | Day 5 | 0 µg/ml     | 1,00±0,10 | 1,04±0,04 |           |
| <b>TRAF6</b> | Day 5 | 0.035 µg/ml | 0,99±0,14 | 1,01±0,06 |           |
| <b>TRAF6</b> | Day 5 | 4.375 µg/ml | 0,92±0,11 | 1,10±0,04 |           |
| <b>TRPV4</b> | Day 1 | 0 µg/ml     | 1,01±0,18 | 1,00±0,03 | 0,97±0,05 |
| <b>TRPV4</b> | Day 1 | 0.035 µg/ml | 0,85±0,04 | 0,94±0,09 | 1,22±0,49 |
| <b>TRPV4</b> | Day 1 | 4.375 µg/ml | 0,86±0,06 | 0,92±0,08 | 1,39±0,50 |
| <b>TRPV4</b> | Day 5 | 0 µg/ml     | 1,10±0,60 | 0,99±0,05 |           |
| <b>TRPV4</b> | Day 5 | 0.035 µg/ml | 1,13±0,40 | 0,98±0,03 |           |
| <b>TRPV4</b> | Day 5 | 4.375 µg/ml | 0,81±0,02 | 0,93±0,04 |           |
| <b>VEGFA</b> | Day 1 | 0 µg/ml     | 1,01±0,13 | 1,02±0,24 | 0,91±0,61 |
| <b>VEGFA</b> | Day 1 | 0.035 µg/ml | 0,94±0,04 | 0,90±0,13 | 0,62±0,19 |
| <b>VEGFA</b> | Day 1 | 4.375 µg/ml | 1,00±0,05 | 1,06±0,19 | 0,83±0,43 |
| <b>VEGFA</b> | Day 5 | 0 µg/ml     | 1,00±0,09 | 1,04±0,08 |           |
| <b>VEGFA</b> | Day 5 | 0.035 µg/ml |           |           |           |
| <b>VEGFA</b> | Day 5 | 4.375 µg/ml |           |           |           |
